# Supplementary material
Source: Frontiers journal article supplement (https://www.frontiersin.org/articles/478971)
Supplement: Data_Sheet_1.PDF [file Data_Sheet_1.PDF]

## Supplementary Material

### Supplemental Figure 1

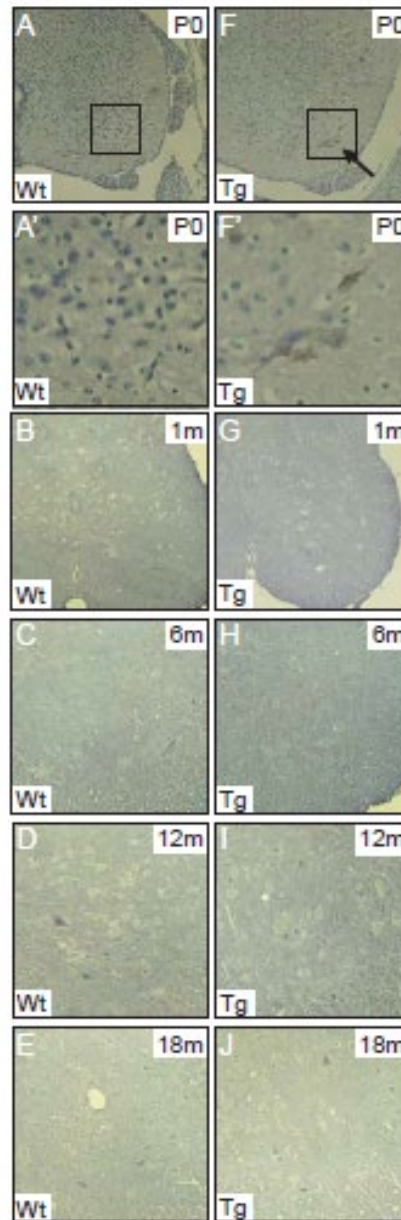

**Supplementary Figure 1.** Wild type controls (Wt) and transgenic (Tg) tissues were stained for V5-DAB. Spinal cords from Wt control have no expression of V5-PFN1<sup>C71G</sup> (A-E). Cells in the anterior horn of the spinal cord in Tg P0 pups show limited V5-PFN1<sup>C71G</sup> expression (F, Arrow, and zoomed area F'). There is no V5-PFN1<sup>C71G</sup> expression in the spinal cords of adult Tg mice (G-J).
